# Supplementary material
Source: PubMed Central journal article supplement (PMC8258088)

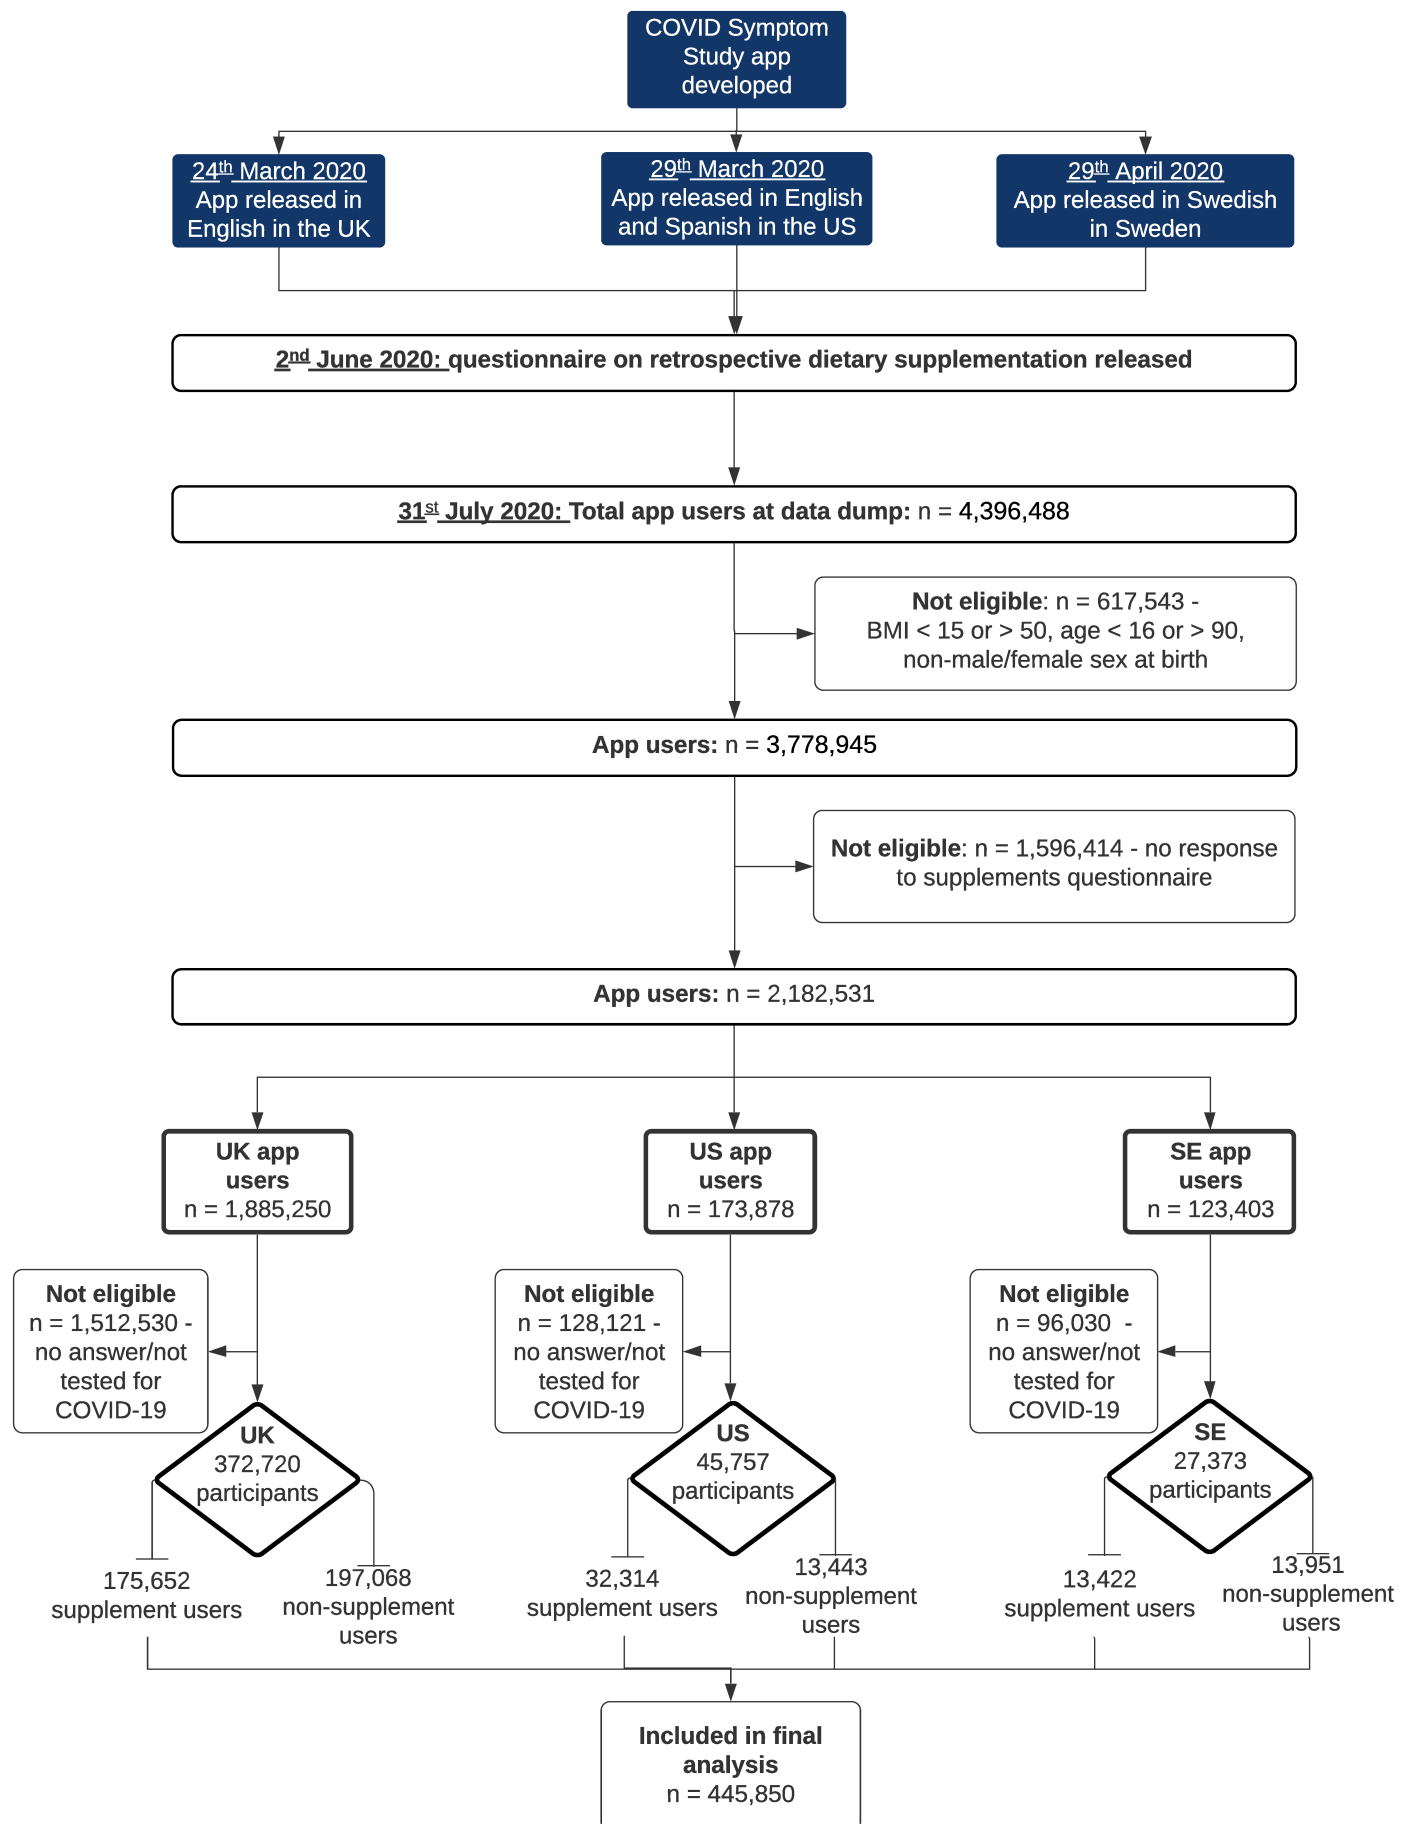

Supplement: bmjnph-2021-000250supp001.pdf [file bmjnph-2021-000250supp001.pdf]
