# Supplementary material
Source: PubMed Central journal article supplement (PMC8258088)
Supplement: bmjnph-2021-000250supp003.pdf [file bmjnph-2021-000250supp003.pdf]

**Table S2. Associations between testing positive for SARS-CoV-2 and self-reported use of supplements in UK, US and SE app users. Crude OR[95%CI] are reported.**

| Supplement           | UK              |          | US              |          | SE              |          |
|----------------------|-----------------|----------|-----------------|----------|-----------------|----------|
|                      | OR[95%CI]       | P        | OR[95%CI]       | P        | OR[95%CI]       | P        |
| <b>Omega-3</b>       | 0.82[0.79;0.85] | 3.57E-22 | 0.56[0.5;0.62]  | 1.28E-24 | 0.86[0.76;0.96] | 8.96E-03 |
| <b>Probiotics</b>    | 0.88[0.83;0.92] | 1.32E-07 | 0.69[0.62;0.77] | 9.66E-11 | 0.67[0.56;0.77] | 4.53E-07 |
| <b>Garlic</b>        | 1.03[0.95;1.11] | 5.25E-01 | 0.98[0.78;1.19] | 8.87E-01 | 0.88[0.72;1.05] | 2.00E-01 |
| <b>Multivitamins</b> | 0.88[0.85;0.91] | 3.42E-17 | 0.69[0.63;0.74] | 5.94E-19 | 0.8[0.73;0.88]  | 1.97E-06 |
| <b>Vitamin D</b>     | 0.88[0.85;0.9]  | 1.19E-19 | 0.58[0.53;0.63] | 2.46E-35 | 0.83[0.76;0.9]  | 1.66E-05 |
| <b>Vitamin C</b>     | 1.02[0.99;1.06] | 1.97E-01 | 0.81[0.73;0.89] | 1.63E-05 | 0.91[0.82;0.99] | 4.86E-02 |
| <b>Zinc</b>          | 1.06[1.02;1.11] | 8.16E-03 | 0.92[0.81;1.03] | 1.92E-01 | 0.91[0.79;1.02] | 1.12E-01 |
